# Emergence of Clinically Relevant Non-Tuberculous Mycobacterial Infections in Saudi Arabia

Bright Varghese<sup>1\*</sup>, Ziad Memish<sup>2</sup>, Naila Abuljadayel<sup>2</sup>, Raafat Al-Hakeem<sup>2</sup>, Fahad Alrabiah<sup>3</sup>, Sahal Abdulaziz Al-Hajoj<sup>1\*</sup>

**1** Mycobacteriology Research Section, Department of Infection and Immunity, King Faisal Specialist Hospital and Research Centre, Riyadh, Saudi Arabia, **2** Ministry of Health, Riyadh, Saudi Arabia, **3** Department of Medicine, King Faisal Specialist Hospital and Research Centre, Riyadh, Saudi Arabia

## Abstract

**Background:** Non-Tuberculous Mycobacteria (NTM) are emerging around the world due to a higher prevalence of immunosuppressive illness and therapy. Saudi Arabia is not an exception as there have been novel mycobacterial species also identified. In addition, several published case reports from different parts of the country suggest a growing pathogenic potential of NTM. As the first nationwide study, we sought to gain an insight into the species diversity of NTM clinical isolates.

**Methodology/Principal findings:** During June 2009–July 2010, 95 clinical isolates were collected from tuberculosis reference laboratories in major provinces within Saudi Arabia and subjected to standard line probe assay techniques to identify their species. Diagnostic guidelines of the American Thoracic Society were applied to determine the clinical relevance of respiratory isolates. Species diversity (13 species) was very high and dominated (61.0%) by rapid growing NTM. The major species obtained were *Mycobacterium abscessus*, *M. fortuitum*, *M. intracellulare* followed by *M. kansasii*, *M. goodanae* and *M. avium*. Interestingly this study reports for the first time the clinical relevance of *M. celatum*, *M. xenopi*, *M. scrofulaceum*, *M. lentiflavum*, *M. asiaticum* and *M. simiae* in Saudi Arabia. Of the total, 67.1% were clinically relevant respiratory cases, 23.2% were non-respiratory cases and 9.7% were respiratory colonizers. Coexisting illness was reported in 53.7% of the studied cases. The major risk factors observed among the patients were previous history of tuberculosis, chronic obstructive pulmonary disorder and human immunodeficiency virus infection.

**Conclusion/Significance:** The high rates of clinically confirmed respiratory cases suggest that NTM infections are indeed a new challenge to health authorities. The current findings show an opposite picture of the Western world where *M. avium complex* and particularly slow growing NTM are the most predominant respiratory pathogens. The complexity of species demands an immediate strengthening of the current diagnostic facilities.

**Citation:** Varghese B, Memish Z, Abuljadayel N, Al-Hakeem R, Alrabiah F, et al. (2013) Emergence of Clinically Relevant Non-Tuberculous Mycobacterial Infections in Saudi Arabia. *PLoS Negl Trop Dis* 7(5): e2234. doi:10.1371/journal.pntd.0002234

**Editor:** Pamela L. C. Small, University of Tennessee, United States of America

**Received:** July 25, 2012; **Accepted:** April 13, 2013; **Published:** May 30, 2013

**Copyright:** © 2013 Varghese et al. This is an open-access article distributed under the terms of the Creative Commons Attribution License, which permits unrestricted use, distribution, and reproduction in any medium, provided the original author and source are credited.

**Funding:** The study was financially supported by King Abdulaziz City for Science and Technology, Riyadh, Saudi Arabia (Grant code AT-116/28). The funders had no role in study design, data collection and analysis, decision to publish, or preparation of the manuscript.

**Competing Interests:** The authors have declared that no competing interests exist.

\* E-mail: bvarghese99@kfshrc.edu.sa (BV); hajoj@kfshrc.edu.sa (SAH)

## Introduction

Globally humans are exposed extensively to environmental sources (soil, water, plant and animal materials) of mycobacteria. Predominantly Non-Tuberculous Mycobacterial (NTM) disease develops among immuno-compromised individuals although recently they emerge among immuno-competent persons also [1]. Generally NTM are resistant to most of the disinfectants and when present on non-sterile patients samples and contaminated medical equipment leads to pseudo outbreaks [2]. The international guidelines to establish the pseudo-infection from NTM disease and their clinical relevance has been published by the American Thoracic Society (ATS) and Infectious Disease Society of America (IDSA). These guidelines recommends minimum of two separately expectorated sputum samples or one bronchial wash or lavage culture positivity in patients with pulmonary symptoms and suggestive chest radiograph images to confirm a

relevant pulmonary infection. However culture from any sterile site can be considered as part of a disease [1]. Indeed it is crucial to detect and identify the NTM up to species level rapidly during early stages of diagnosis. Rapid diagnosis supports the infection control and provision for appropriate drug regimens though it differs from tuberculosis treatment.

Annually 4300 cases of new mycobacterial infections are reported in Saudi Arabia [3]. There are several published case reports of extra pulmonary NTM diseases in the country. Most of these reports were focused on patients who underwent transplantations and particularly reported with peritonitis [4,5,6]. Nevertheless, only few studies analyzed the pulmonary NTM infections and very little is known about the NTM prevalence in the country [7,8,9]. Interestingly a novel species of mycobacteria (*M. riyadhense*) also reported from the country [10]. However the prevalence is expected to rise as immuno-compromised medical conditions (transplantations, genetic disorders, various immunosuppressive

## Author Summary

Non-Tuberculous Mycobacteria (NTM) are opportunistic human pathogens. Global reports show an emergence of various NTM diseases among immuno-suppressed as well as immuno-competent individuals. In Saudi Arabia, data are scarce on the prevalence of NTM and their genetic diversity. Currently, NTM infections are neglected in the country and the real magnitude of problems is still masked. As the first study of its type to be conducted in Saudi Arabia, we sought to explore the species spectrum of NTM by utilizing a nationwide collection of clinical isolates. The NTM species diversity is large and shows a different trend compared to Western countries as rapidly growing mycobacterial species are the most prevalent to cause diseases in the country. A large number of clinically relevant pulmonary cases show high pathogenic potential of NTM. Indeed, timely identification of mycobacterial species will lead to adapting an appropriate therapy and supports the implementation of control policies which is urgently needed in the country.

illness and treatments) are high. Moreover the treatment of NTM infections in the country is empirical as species identification facilities are limited to common species. There have been no nationwide studies so far in the Gulf Corporation Council countries (GCC) particularly in Saudi Arabia on the clinical relevance and species diversity of NTM. Therefore a prospective study to determine the species spectrum of both pulmonary and extra-pulmonary NTM isolates from all the provinces of the country was conducted. We report here for the first time the diversity of clinically relevant NTM in Saudi Arabia.

## Materials and Methods

### Study samples

During June 2009–July 2010, 2456 mycobacterial culture isolates were collected from tuberculosis reference laboratories which are the major TB diagnostic destinations in the country. The isolates were cultured in Lowenstein-Jensen's media and Mycobacterial Growth Indicator Tubes (MGIT 960; Becton Dickinson, NJ, USA). The genomic DNA was extracted by using the standard spin column technique (Qiagen, Hilden, Germany).

Primary NTM screening was carried by using the GenoType MTBC kit (Hain Life Science, Nehren, Germany) as per the manufacturer's recommendation. Resulting to the primary screening, 95 non repetitive isolates were characterized as NTM and subjected to further investigation. The demographical and clinical data of the patients were collected by referring to medical records and crosschecked against the national mycobacterial registry maintained by the Ministry of Health. All the data collected for the study was anonymized and no patient identifiers were used throughout data collection and analysis period. The study was approved by the research ethical committee of King Faisal Specialist Hospital and Research Centre.

### Identification of NTM species

Identification of species was carried out by the reverse hybridization based line probe assay according to the manufacturer's recommendations and procedure described elsewhere [11]. Primary identification used the kit GenoType Mycobacterium CM (Hain Life science, Nehren, Germany) which targets the most common species of mycobacteria. Unidentified isolates from this assay were further investigated with the kit for additional species

GenoType Mycobacterium AS (Hain Life science, Nehren, Germany). The final results after hybridization on the strips were scanned using the automated system Genoscan (Hain Life science, Nehren, Germany).

### Data analysis

The results of hybridization were interpreted by using the Blotrix software (Hain Lifescience, Nehren, Germany). The clinical and demographical data were analyzed by using SPSS version 19.0 (IBM, NY, USA) software package. The standardized diagnostic criteria of ATS/IDSA were applied to determine the clinical relevance of respiratory isolates [1]. As per the recommendations sputum samples with multiple NTM isolation and smear positivity were considered to be clinically relevant. Bronchial lavage or Non respiratory specimens with one time smear positivity and isolation were also considered as relevant. From the available clinical records of the patients, major risk factors were abstracted and analyzed.

## Results

### Study population

Demographical data revealed that majority of patients were born in Saudi Arabia (62.1%). The median of age was 43 years and the age group >60 years (41%) was the highly infected group followed by 6–40 (29.5%), 41–59 (23.2%) and ≤5 years (6.3%) respectively. Proportion of male patients (55.8%) was higher than females. The higher rate of NTM infections were observed in the

**Table 1.** Summary of the study subjects.

| Parameters                     | Sample Proportion (No/%) |
|--------------------------------|--------------------------|
| <b>Nationality</b>             |                          |
| Saudi                          | 59(62.1)                 |
| Non Saudi                      | 36(37.9)                 |
| <b>Age groups</b>              |                          |
| <5 Years                       | 6(6.3)                   |
| 6–40                           | 28(29.5)                 |
| 41–59                          | 22(23.2)                 |
| >60                            | 39(41)                   |
| <b>Gender</b>                  |                          |
| Male                           | 53(55.8)                 |
| Female                         | 42(44.2)                 |
| <b>Geographic Distribution</b> |                          |
| Central                        | 30(31.5)                 |
| East                           | 26(27.4)                 |
| South                          | 11(11.6)                 |
| West                           | 28(29.5)                 |
| <b>Sample type</b>             |                          |
| Sputum                         | 52(54.7)                 |
| Bronchial Lavage/aspirate      | 21(22.1)                 |
| Lymphnode biopsy/aspirate      | 14(14.7)                 |
| Pus                            | 5(5.3)                   |
| Urine                          | 2(2.1)                   |
| Pleural fluid                  | 1(1)                     |

doi:10.1371/journal.pntd.0002234.t001

central region of the country followed by Western and Eastern provinces (Table 1).

Pulmonary specimens were predominant [sputum 52(54.7%)/ bronchial lavage/wash-21(22.1%)] followed by lymph node biopsy/aspirate-14(14.7%), pus 5(5.3%), urine 2(2.1%) and pleural fluid 1(1.0%). Pulmonary infections were observed in 73 (76.8%) patients while 22 (23.2%) were extrapulmonary sites (Table 1).

### Diversity of NTM

The spectrum of NTM species was high (13 species) and predominated by the rapid growing *M. abscessus* (30.5%) and *M. fortuitum* (29.5%). The slow growing species mainly consisted of *M. intracellulare* (12.6%), *M. kansasii* (6.8%) and *M. avium* (6.8%) respectively (Figure 1).

### Pulmonary and extra-pulmonary isolates

Among the 73 respiratory cases 49(67.1%) meet the ATS/IDSA guidelines for NTM disease, whereas 24 (32.9%) isolates were suspected as colonizers. *M. fortuitum* and *M. abscessus* were the most common respiratory pathogens and *M. fortuitum* also showed the highest colonization. *M. intracellulare*, *M. kansasii* and *M. avium* were also clinically relevant (Table 2). *M. abscessus* (36.4%) was predominant among the non respiratory isolates and interestingly *M. lentiflavum* and *M. scrofulaceum* were found only among extra-pulmonary cases (Table 3).

### Risk factors

Suspected co-morbid conditions were available only for 51(53.7%) patients. Some of the patients had multiple risk

conditions. Major predisposing conditions observed were, previous history of *M. tuberculosis* disease (PMTD) 28(29.5%), chronic obstructive pulmonary disorder (COPD) 11(11.6%), HIV reactivity-7(7.4%), continuous ambulatory peritoneal dialysis (CAPD) 5(5.3%), cystic fibrosis (CF) 3(3.2%) and pulmonary fibrosis 1(1%) respectively. Any other risk factors including the concomitant treatment or other immuno suppressive ailments among the study subjects were not available in the patient records (Tables 2–3).

### Discussion

This study sought to evaluate the diversity of clinically important NTM species in Saudi Arabia. According to recent reports the annual overall mycobacterial disease burden in Saudi Arabia is mainly observed among the migrant workforce [12]. However the current findings show an increasing problem of NTM infections among Saudis (62.1%). Predominance of the Saudi nationals and gender male in the study are in concordance with previous studies which showed that origin of patient and gender are risk factors for NTM infections [13,14]. The interesting fact is that, the higher number of cases were found among elderly and their role as a demographical risk factor for NTM infection was also previously described [14,15]. However it is assumed from the findings that Saudi nationals particularly men above 60 years can be a relatively high risk group for NTM infections in the country.

Rate of clinically relevant respiratory diseases after applying the stringent guidelines (ATS/IDSA) were found to be high in the study (67.1%). This is a serious event to report the high significance of pulmonary NTM infections in the Saudi Arabian

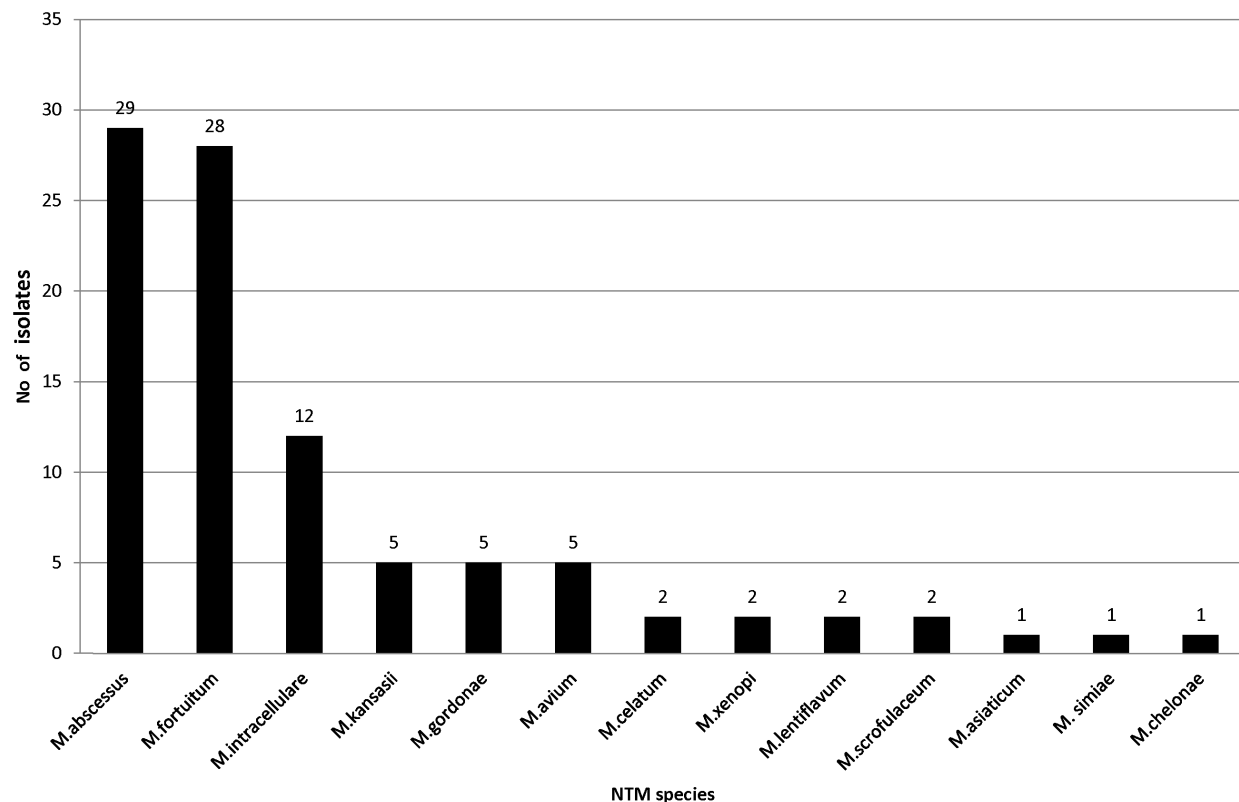

**Figure 1. Overall species diversity of 95 clinical non-tuberculous mycobacterial isolates from Saudi Arabia.** The diagram shows collective representation of pulmonary and extra-pulmonary isolates. The number of isolates with particular species are showed at the outer end of the bar diagram.

doi:10.1371/journal.pntd.0002234.g001

**Table 2.** Summary of the 73 pulmonary samples with NTM infections during 2009–2010 from Saudi Arabia.

| Species                  | No/%      | Specimen | AFB smear |          | Risk factors                                                                               | No. of samples |          | Clinical Relevance* |                        |
|--------------------------|-----------|----------|-----------|----------|--------------------------------------------------------------------------------------------|----------------|----------|---------------------|------------------------|
|                          |           |          | Positive  | Negative |                                                                                            | Single         | Multiple | Confirmed           | Suspected Colonization |
| <i>M. fortuitum</i>      | 25(34.2)  | Sputum   | 16        | 3        | PMTD <sup>†</sup> (4), HIV <sup>‡</sup> (2), COPD <sup>±</sup> (3), CAPD <sup>++</sup> (2) | 11             | 8        | 14                  | 11                     |
|                          |           | BAL      | 6         |          |                                                                                            | 6              |          |                     |                        |
| <i>M. abscessus</i>      | 21 (28.8) | Sputum   | 10        | 3        | PMTD(5), HIV(1), PFB <sup>¶</sup>                                                          | 6              | 7        | 15                  | 6                      |
|                          |           | BAL      | 7         | 1        |                                                                                            | 5              | 3        |                     |                        |
| <i>M. intracellulare</i> | 9(9.7)    | Sputum   | 9         |          | PMTD(2), COPD (2)                                                                          | 4              | 5        | 5                   | 4                      |
| <i>M. kansasii</i>       | 5(6.8)    | Sputum   | 3         |          | HIV(1), PMTD(1), CF <sup>#</sup> (1) COPD (1)                                              | 1              | 2        | 4                   | 1                      |
|                          |           | BAL      | 2         |          |                                                                                            | 2              |          |                     |                        |
| <i>M. avium</i>          | 5(6.8)    | Sputum   | 5         |          | HIV(1), CF(1), COPD(2)                                                                     | 2              | 3        | 3                   | 2                      |
| <i>M. gordonae</i>       | 2(2.7)    | Sputum   | 2         |          | HIV(1)                                                                                     |                | 2        | 2                   |                        |
| <i>M. xenopi</i>         | 2(2.7)    | BAL      | 2         |          | PMTD(2)                                                                                    |                | 2        | 2                   |                        |
| <i>M. celatum</i>        | 2(2.7)    | BAL      | 2         |          | PMTD(1)                                                                                    |                | 2        | 2                   |                        |
| <i>M. asiaticum</i>      | 1(1.4)    | Sputum   | 1         |          | PMTD                                                                                       |                | 1        | 1                   |                        |
| <i>M. simiae</i>         | 1 (1.4)   | BAL      | 1         |          | PMTD                                                                                       |                | 1        | 1                   |                        |

\*Based on ATS/IDSA 2007 guidelines.

<sup>†</sup>Previous mycobacterium tuberculosis disease.

<sup>‡</sup>Human immunodeficiency virus.

<sup>¶</sup>Pulmonary fibrosis.

<sup>#</sup>Cystic fibrosis.

<sup>±</sup>Chronic obstructive pulmonary disease.

<sup>++</sup>Continuous ambulatory peritoneal dialysis.

doi:10.1371/journal.pntd.0002234.t002

society. It is worth to mention that higher compliance of pulmonary cases with the standard diagnostic criteria may either reflects the sampling limitation (small size and not complete coverage) or the real picture of NTM prevalence in the country. Nonetheless this indicates an emergency event which seriously requires attention from concerned authorities. Neighboring countries also reported an increasing prevalence of NTM diseases recently [13,16].

Here we report for the first time the clinical relevance of six species namely *M. celatum*, *M. xenopi*, *M. scrofulaceum*, *M. lentiflavum*, *M. asiaticum* and *M. simiae* in Saudi Arabia. However there were previously reported cases of *M. abscessus*, *M. fortuitum*, *M. kansasii*, *M. chelonae*, *M. gordonae*, *M. intracellulare* and *M. avium* [9,17,18,19,20].

Varghese et al. recently reported the predominance of *M. abscessus* in causing chronic lung infections among healthy individuals in the country [9]. The domination of the rapid growing mycobacterial species *M. fortuitum* and *M. abscessus* among pulmonary and extra-pulmonary cases in the current study are in concordance with a recent report from Eastern Asia [21]. The predominance of *M. fortuitum* in the country par resembles the recent finding from the neighboring country Kuwait [13]. The most common NTM species found in the Asian countries and rest of the world was *M. avium* complex. On the other hand, *M. intracellulare* sequevars were found in Saudi Arabia [21,22]. Existence of *M. lentiflavum* in urine is an unusual site of infection that was found in two cases corroborating with a previous study from Greece with similar findings [23].

**Table 3.** Summary of the 22 extra-pulmonary NTM infections observed in the study.

| Mycobacterial species    | No of cases/% | Source of specimen              | Identified Risk Factors       |
|--------------------------|---------------|---------------------------------|-------------------------------|
| <i>M. abscessus</i>      | 8(36.4)       | LN (FNA/BP) <sup>†</sup> , pus  | PMTD <sup>¶</sup> (6)         |
| <i>M. fortuitum</i>      | 3(13.6)       | LN (FNA/BP), Pus, Pleural fluid | CF <sup>#</sup> (1), CAPD (1) |
| <i>M. intracellulare</i> | 3(13.6)       | LN (FNA/BP)                     | PMTD(2)                       |
| <i>M. gordonae</i>       | 3(13.6)       | LN (FNA/BP)                     | HIV* (1), PMTD (1)            |
| <i>M. lentiflavum</i>    | 2(9.1)        | Urine                           |                               |
| <i>M. scrofulaceum</i>   | 2(9.1)        | LN (FNA/BP)                     | PMTD                          |
| <i>M. chelonae</i>       | 1(4.5)        | LN (FNA/BP)                     | PMTD                          |

<sup>†</sup>Lymphnode/Fine Needle Aspiration/Biopsy.

<sup>¶</sup>Previous mycobacterium tuberculosis disease.

<sup>#</sup>Cystic fibrosis.

\*Human immunodeficiency virus.

doi:10.1371/journal.pntd.0002234.t003

Preexisting pulmonary conditions were the highest risk factors found in the study and remaining patients may have concurrent illness or immunosuppressive medications. The regular NTM infections among CAPD patients in the country was reported in earlier studies which supports the current observations [24]. NTM diseases among healthy individuals is not rare as it has been reported from Saudi Arabia also [9]. In addition patients without known risk factors may possess a unique genetic susceptibility or environmental exposure to NTM [25]. The immunosuppressive conditions other than the respiratory illness including solid organ transplantation, hematological and other malignancies, chronic renal failure and diabetes mellitus are emerging challenges in the country [26,27,28]. In addition the increased prevalence of primary immuno deficiencies mainly because of the world's highest rate of consanguinity (~60%) makes the Saudi population more vulnerable to NTM infections [29].

The study has certain limitations; the sample volume was smaller to conclude about the nationwide prevalence of NTM, information of concomitant medications and malignancies were not available for any studied cases in the referred records. On the other hand the study was not designed for a nationwide 100% sample collection. Due to minimal representation of isolates to each geographic region a prevalence estimate preparation was impossible.

## References

- Griffith DE, Aksamit T, Brown-Elliott BA, Catanzaro A, Daley C, et al. (2007) An official ATS/IDSA statement: diagnosis, treatment, and prevention of nontuberculous mycobacterial diseases. *Am J Respir Crit Care Med* 175: 367–416.
- Phillips MS, von Reyn CF (2001) Nosocomial infections due to nontuberculous mycobacteria. *Clin Infect Dis* 33: 1363–1374.
- World Health Organization (2011) Global tuberculosis control report- 2011. Geneva, Switzerland.
- Somily AM, A-Anazi AR, Babay HA, Al-Aska AI, Al-Hedaithy MA, et al. (2010) *Mycobacterium chelonae* complex bacteremia from a post-renal transplant patient: case report and literature review. *Jpn J Infect Dis* 63: 61–64.
- Siddiqi N, Sheikh I (2012) Peritonitis caused by *Mycobacterium abscessus* in patients on continuous ambulatory peritoneal dialysis. *Saudi J Kidney Dis Transpl* 23: 321–324.
- Qunibi WY, a-Sibai MB, Taher S, Harder EJ, de Vol E, et al. (1990) Mycobacterial infection after renal transplantation—report of 14 cases and review of the literature. *The Quarterly Journal of Medicine* 77: 1039–1060.
- Ellis ME, Qadri SM (1993) Mycobacteria other than tuberculosis producing disease in a tertiary referral hospital. *Ann Saudi Med* 13: 508–515.
- BaHammam A, Kambal A, Sharif Y, Masood M, Isnani A, et al. (2005) Comparison of clinico-radiological features of patients with positive cultures of nontuberculous mycobacteria and patients with tuberculosis. *Saudi Med J* 26: 754–758.
- Varghese B, Shajan SE, Al-Saedi MO, Al-Hajoj SA (2012) First case report of chronic pulmonary lung disease caused by *Mycobacterium abscessus* in two immunocompetent patients in Saudi Arabia. *Ann Saudi Med* 32: 312–314.
- van Ingen J, Al-Hajoj SA, Boeree M, Al-Rabiah F, Enaimi M, et al. (2009) *Mycobacterium riyadhense* sp. nov., a non-tuberculous species identified as *Mycobacterium tuberculosis* complex by a commercial line-probe assay. *Int J Syst Evol Microbiol* 59: 1049–1053.
- Richter E, Rusch-Gerdes S, Hillemann D (2006) Evaluation of the GenoType *Mycobacterium* Assay for identification of mycobacterial species from cultures. *J Clin Microbiol* 44: 1769–1775.
- Abouzeid MS, Zumla AI, Felemban S, Alotaibi B, O'Grady J, et al. (2012) Tuberculosis trends in Saudis and non-Saudis in the kingdom of Saudi Arabia - a 10 year retrospective study (2000–2009). *PLoS One* 7: e39478.
- Mokaddas E, Ahmad S (2008) Species spectrum of nontuberculous mycobacteria isolated from clinical specimens in Kuwait. *Curr Microbiol* 56: 413–417.
- Cassidy PM, Hedberg K, Saulson A, McNelly E, Winthrop KL (2009) Nontuberculous mycobacterial disease prevalence and risk factors: a changing epidemiology. *Clin Infect Dis* 49: e124–129.
- De Groote MA, Huit G (2006) Infections due to rapidly growing mycobacteria. *Clin Infect Dis* 42: 1756–1763.
- Al-Mahruqi SH, van-Ingen J, Al-Busaidy S, Boeree MJ, Al-Zadjali S, et al. (2009) Clinical relevance of nontuberculous Mycobacteria, Oman. *Emerg Infect Dis* 15: 292–294.
- Enani MA, Frayha HH, Halim MA (1998) An appendiceal abscess due to *Mycobacterium kansasii* in a child with AIDS. *Clin Infect Dis* 27: 891–892.
- El Mouzan MI, Assiri AM, Al Herbish AS, Al Sohaibani MO (2006) Endoscopic duodenal biopsy in children. *Saudi J Gastroenterol* 12: 31–33.
- Wali SO, Abdelaziz MM, Krayem AB, Samman YS, Shukairi AN, et al. (2008) The presence of atypical mycobacteria in the mouthwashes of normal subjects: role of tap water and oral hygiene. *Ann Thorac Med* 3: 5–8.
- Simbli MA, Niaz FA, Al-Wakeel JS (2012) Encapsulating peritoneal sclerosis in a peritoneal dialysis patient presenting with complicated *Mycobacterium fortuitum* peritonitis. *Saudi J Kidney Dis Transpl* 23: 635–641.
- Simons S, van Ingen J, Hsueh PR, Van Hung N, Dekhuijzen PN, et al. (2011) Nontuberculous mycobacteria in respiratory tract infections, eastern Asia. *Emerg Infect Dis* 17: 343–349.
- Martin-Casabona N, Bahrmand AR, Bennedsen J, Thomsen VO, Curcio M, et al. (2004) Non-tuberculous mycobacteria: patterns of isolation. A multi-country retrospective survey. *Int J Tuberc Lung Dis* 8: 1186–1193.
- Neonakis IK, Giti Z, Kourbeti IS, Michelaki H, Baritaki M, et al. (2007) Mycobacterial species diversity at a general hospital on the island of Crete: first detection of *Mycobacterium lentiflavum* in Greece. *Scand J Infect Dis* 39: 875–879.
- Youmbissi JT, Malik QT, Ajit SK, al Khursany IA, Rafi A, et al. (2001) Non tuberculous mycobacterium peritonitis in continuous ambulatory peritoneal dialysis. *J Nephrol* 14: 132–135.
- Bodle EE, Cunningham JA, Della-Latta P, Schluger NW, Saiman L (2008) Epidemiology of nontuberculous mycobacteria in patients without HIV infection, New York City. *Emerg Infect Dis* 14: 390–396.
- Saudi Cancer Registry Ministry of Health, Saudi Arabia (2007) Cancer Incidence and Survival Report, Saudi Arabia-2007.
- Alqurashi KA, Aljabri KS, Bokhari SA (2011) Prevalence of diabetes mellitus in a Saudi community. *Ann Saudi Med* 31: 19–23.
- Al-Sayyari AA, Shaheen FA (2011) End stage chronic kidney disease in Saudi Arabia. A rapidly changing scene. *Saudi Med J* 32: 339–346.
- El Mouzan MI, Al Salloum AA, Al Herbish AS, Qurachi MM, Al Omar AA (2008) Consanguinity and major genetic disorders in Saudi children: a community-based cross-sectional study. *Ann Saudi Med* 28: 169–173.

In conclusion the magnitude of true NTM disease in Saudi Arabia is escalating. Presence of highly diverse NTM species even among immunocompetent individuals needed an immediate attention. The emergence of rapid growing species with predominance shows an opposite trend to the Western world where slow growing species are dominated. This difference might be due to the subtropical or desert like geographical status of the country. We emphasize on the pathogenic potential of rapid growing NTM species to cause pulmonary and extra-pulmonary diseases in the Saudi Arabian community. This study warrants the need to explore all the risk factors that lead to the NTM disease in the country. Thus the findings demand a large scale nationwide study in collaboration with neighboring countries to find the real magnitude of NTM prevalence in the Arabian Peninsula.

## Acknowledgments

We thank Dr. Sriharsha Kantamneni for the critical review of this manuscript.

## Author Contributions

Conceived and designed the experiments: BV SAH. Performed the experiments: BV. Analyzed the data: BV. Contributed reagents/materials/analysis tools: SAH ZM NA RA FA. Wrote the paper: BV SAH ZM FA NA RA.
